# Supplementary material for: Prediction of competing endogenous RNA coexpression network as prognostic markers in AML
Source: Aging (Albany NY). 2019 May 31;11(10):3333–47. doi: 10.18632/aging.101985 (PMC6555472; doi:10.18632/aging.101985)
Supplement: Supplementary Figure [file aging-11-101985-s001.xlsx]

## Sheet: Sheet1
Supplementary Table 1. Univariate cox proportional hazard regression analysis of 120 genes.
Gene	HR	95%CI	P
SERINC5	0.595603	0.49-0.72	1.61e-07
INSR	0.602828	0.47-0.77	5.04e-05
UBN2	0.508212	0.36-0.71	8.34e-05
FAM46A	0.683773	0.57-0.83	9.18e-05
FBXL20	0.415593	0.27-0.65	9.19e-05
MYB	0.618404	0.48-0.79	0.000155331
HOXA9	1.1118	1.05-1.18	0.000188746
HOXA10	1.12449	1.05-1.2	0.000369636
SREK1	0.460563	0.3-0.71	0.000380254
ZNF107	0.662201	0.53-0.83	0.000422716
KRIT1	0.455156	0.29-0.71	0.000434256
RREB1	0.364349	0.21-0.64	0.000453201
KIAA1147	0.647094	0.5-0.83	0.000640803
CREB3L2	0.467614	0.29-0.75	0.00149724
INO80D	0.490714	0.32-0.76	0.0015928
REV3L	0.55923	0.39-0.81	0.00180837
RAB5B	0.542678	0.37-0.8	0.00227554
ZNF431	0.643656	0.48-0.86	0.00295504
ASH1L	0.521615	0.34-0.81	0.00343354
RIF1	0.563487	0.38-0.83	0.00372216
CLOCK	0.60454	0.43-0.85	0.00384144
ZBTB10	0.696476	0.54-0.89	0.00404132
CHD9	0.518189	0.33-0.81	0.00406993
ANKRD50	0.785545	0.67-0.93	0.00429166
SMARCAD1	0.58951	0.41-0.85	0.00529642
SLC25A36	0.56413	0.38-0.85	0.00549172
MEIS1	1.08707	1.02-1.15	0.00628424
PTPN14	0.876166	0.8-0.96	0.00687811
VPS13C	0.654362	0.48-0.89	0.00766524
COX20	0.531606	0.33-0.85	0.00812049
CDK6	0.75321	0.61-0.93	0.0101889
MEF2C	1.23045	1.05-1.44	0.0109848
KIT	0.868647	0.78-0.97	0.0117859
PBRM1	0.527701	0.32-0.88	0.0135574
CTDSPL2	0.541298	0.33-0.88	0.0136301
SPRY2	0.887637	0.81-0.98	0.0152269
ZNF460	0.748587	0.59-0.95	0.0168311
ZNF711	0.929796	0.87-0.99	0.0228578
BCOR	1.79247	1.08-2.96	0.0229011
PAXBP1	0.585603	0.37-0.94	0.0262854
WEE1	1.3941	1.04-1.87	0.0279512
MEST	0.896293	0.81-0.99	0.0344374
RCN2	0.656903	0.44-0.97	0.0368579
UBE2V1	0.591205	0.36-0.97	0.0373025
GPATCH8	0.419748	0.19-0.95	0.0375128
WNK3	1.17101	1.01-1.36	0.0386712
IBTK	0.621529	0.4-0.98	0.0395722
ARID1B	0.653892	0.43-0.98	0.0412445
MED12L	1.10134	1-1.21	0.0445104
EREG	1.06073	1-1.12	0.0454188
IKZF2	0.909396	0.83-1	0.0491516
RPAP2	0.71575	0.51-1.01	0.0555379
PKD2	0.804142	0.64-1.01	0.0557187
KCNQ5	0.901635	0.81-1	0.05598
ZNRF1	0.787911	0.62-1.01	0.0581749
CIT	0.787791	0.61-1.01	0.0603979
EZH2	0.726141	0.52-1.01	0.0605188
STMN1	0.797218	0.63-1.01	0.0635214
NET1	1.23602	0.99-1.55	0.064873
ERC1	0.594739	0.34-1.04	0.0660648
SOX4	0.862521	0.73-1.02	0.0754216
NR2C2	0.648339	0.4-1.05	0.078574
VMA21	0.656631	0.41-1.06	0.0863743
GDF11	0.80639	0.63-1.03	0.0897078
BTBD3	1.39198	0.94-2.05	0.0959298
ZNF644	0.72119	0.49-1.07	0.103449
CBX2	0.910478	0.81-1.02	0.112777
ERG	0.913073	0.81-1.03	0.133447
DDHD1	0.778128	0.55-1.1	0.151643
RUNX1T1	0.940147	0.86-1.03	0.166253
MAN2A1	0.761825	0.51-1.13	0.17559
TBC1D2	1.1503	0.94-1.41	0.178032
NIPA1	1.14208	0.94-1.39	0.189214
DLC1	0.933875	0.84-1.03	0.189652
AKAP11	0.793309	0.56-1.13	0.193948
ADCY6	1.08496	0.96-1.23	0.199751
RFX7	0.775209	0.52-1.15	0.206931
MAT2A	0.790894	0.54-1.16	0.234067
SMCR8	1.36287	0.82-2.27	0.236184
APPL1	0.792353	0.54-1.17	0.238141
DNM1L	0.684803	0.36-1.29	0.241283
JAZF1	0.903201	0.76-1.07	0.243394
ITPR1	1.19034	0.88-1.6	0.252356
PFAS	1.23343	0.86-1.77	0.253712
CLSPN	1.15118	0.89-1.49	0.281186
QSER1	0.828387	0.57-1.19	0.312253
KMT2A	0.827015	0.57-1.2	0.313469
EEA1	0.865079	0.64-1.17	0.349994
ARHGAP32	1.04577	0.95-1.15	0.354689
SLC7A1	1.16116	0.84-1.6	0.357547
OTUD4	0.793127	0.47-1.32	0.375983
BCL7A	1.08705	0.9-1.31	0.384352
SACS	0.876021	0.64-1.2	0.411447
PURA	1.09887	0.87-1.38	0.420602
ERMP1	1.13196	0.82-1.56	0.452824
SH3PXD2A	1.05617	0.91-1.23	0.488006
CEP135	0.891651	0.62-1.29	0.540631
RBBP6	0.820576	0.43-1.56	0.545277
TGFBI	0.976445	0.9-1.06	0.564962
RPS6KA5	0.904493	0.64-1.29	0.57568
POLQ	0.933917	0.73-1.19	0.582152
NOD2	1.02643	0.93-1.14	0.613443
HMBOX1	0.886227	0.55-1.42	0.614511
PHF6	1.089	0.76-1.56	0.640486
CDKN1B	0.928439	0.67-1.29	0.6562
ATAD2	1.07845	0.76-1.52	0.668776
FSCN1	0.974443	0.85-1.11	0.702995
PM20D2	0.959149	0.77-1.19	0.703081
TRIO	0.967826	0.8-1.17	0.73756
MSH2	0.944087	0.67-1.33	0.743731
RBL1	0.94686	0.68-1.32	0.745079
TRIM71	0.991618	0.92-1.07	0.823293
LUZP1	0.960997	0.66-1.4	0.835087
ZC3H12C	0.993359	0.88-1.12	0.913227
NUCKS1	0.980403	0.67-1.43	0.917627
TMEM2	1.01281	0.79-1.3	0.920501
OCRL	1.02407	0.63-1.68	0.924643
ANKRD28	0.991508	0.79-1.24	0.94034
CBX5	1.00278	0.7-1.43	0.987798
XBP1	NA	NA-NA	NA
